# Supplementary material
Source: publisher figshare collection journal article supplement (https://sage.figshare.com/ndownloader/files/22827122)
Supplement: Supplementary file 1 [file 22827122]

## **SUPPLEMENTARY MATERIAL**

### **Design and synthesis of C-ring quinoxaline-substituted sinomenine 1,2,3-triazole derivatives *via* click reactions**

**Tong Lu<sup>a,§</sup>, Ling Dong<sup>b,§</sup>, Hongmei Pan<sup>a</sup>, Xuedan Wu<sup>a</sup>, Xia Chen<sup>a</sup>, Chengwen Gu<sup>a</sup>, Naili Tao<sup>a</sup>, Ao Wang<sup>a</sup>, Kehua Zhang<sup>a,\*</sup>, Jie Jin<sup>a,\*</sup>**

<sup>a</sup> *Key Laboratory of Advanced Functional Materials, Key Laboratory of and Functional Molecule Design and Interface Process, Anhui Jianzhu University, Hefei 230601, P.R. of China*

<sup>b</sup> *Department of Chemistry and Chemical Engineering, Hefei Normal University, Hefei 230601, P.R. of China*

### **<sup>1</sup>H NMR, <sup>13</sup>C NMR and FT-IR of all compounds and some representative HRMS.**

### **Typical <sup>13</sup>C data (6f) assignment for compounds containing C-F bonds**

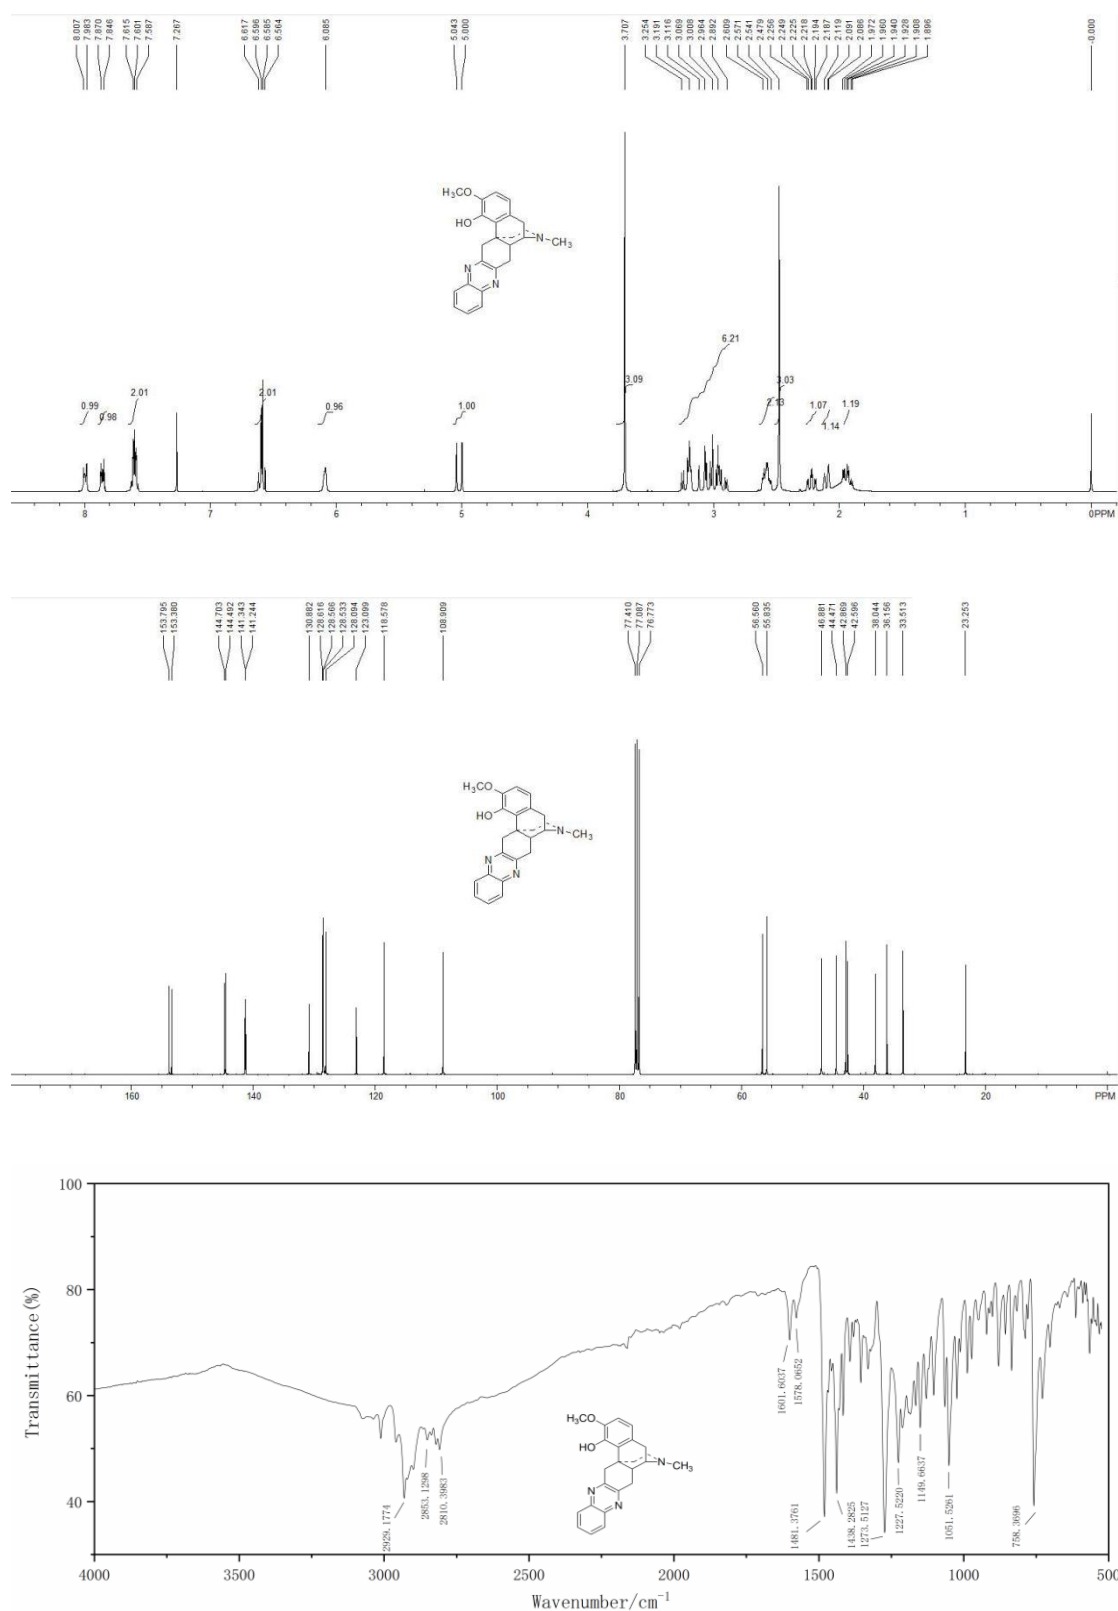

Figure S1 NMR and FT-IR spectra of 3

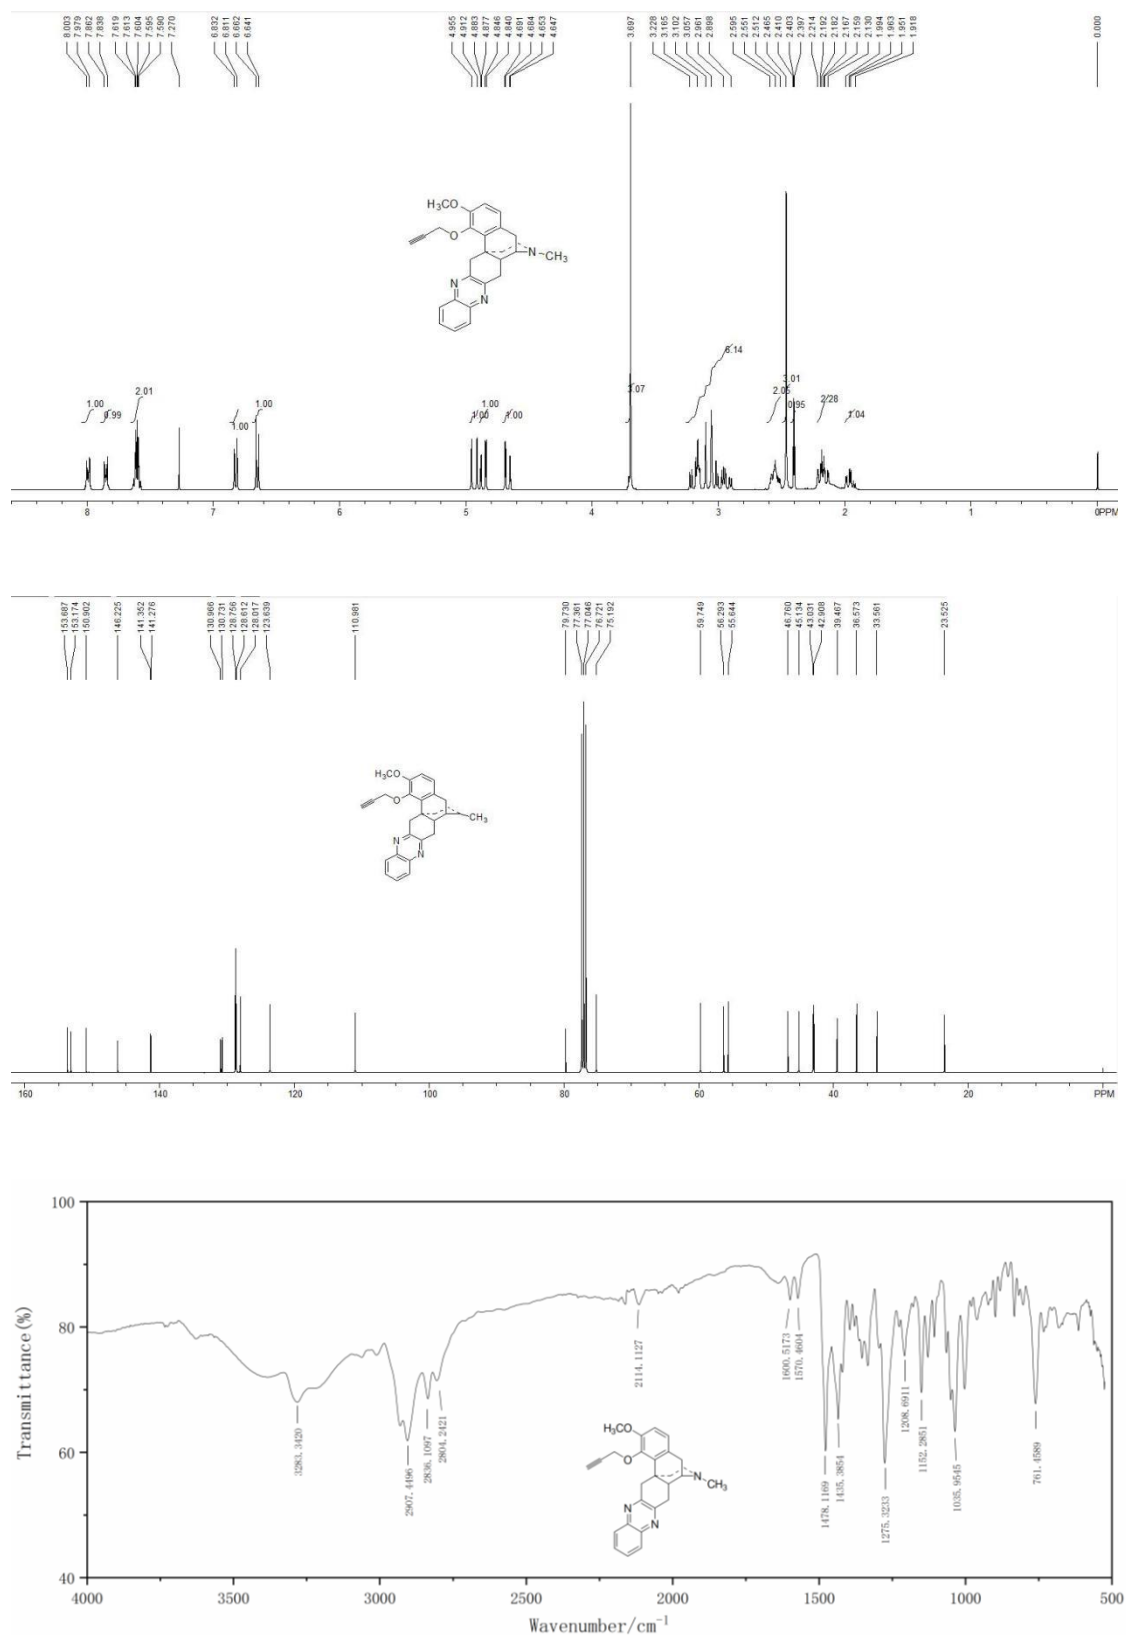

Figure S2 NMR and FT-IR spectra of 4

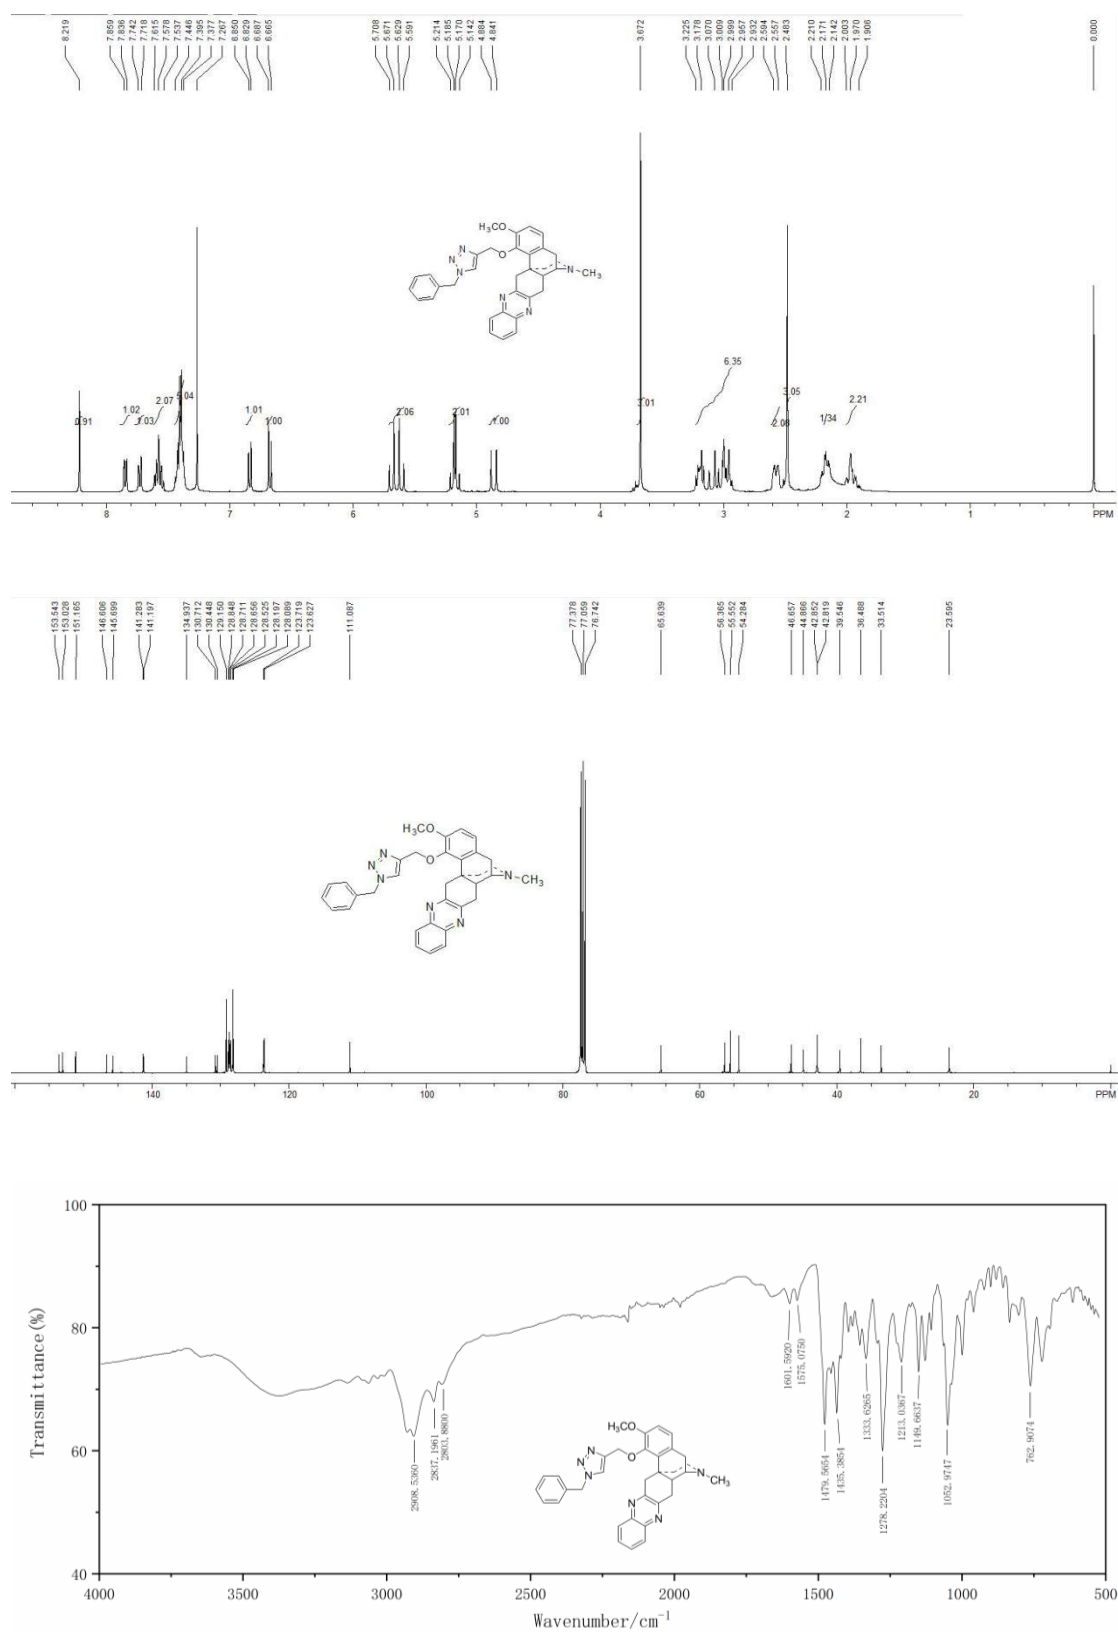

**Figure S3** NMR and FT-IR spectra of 6a

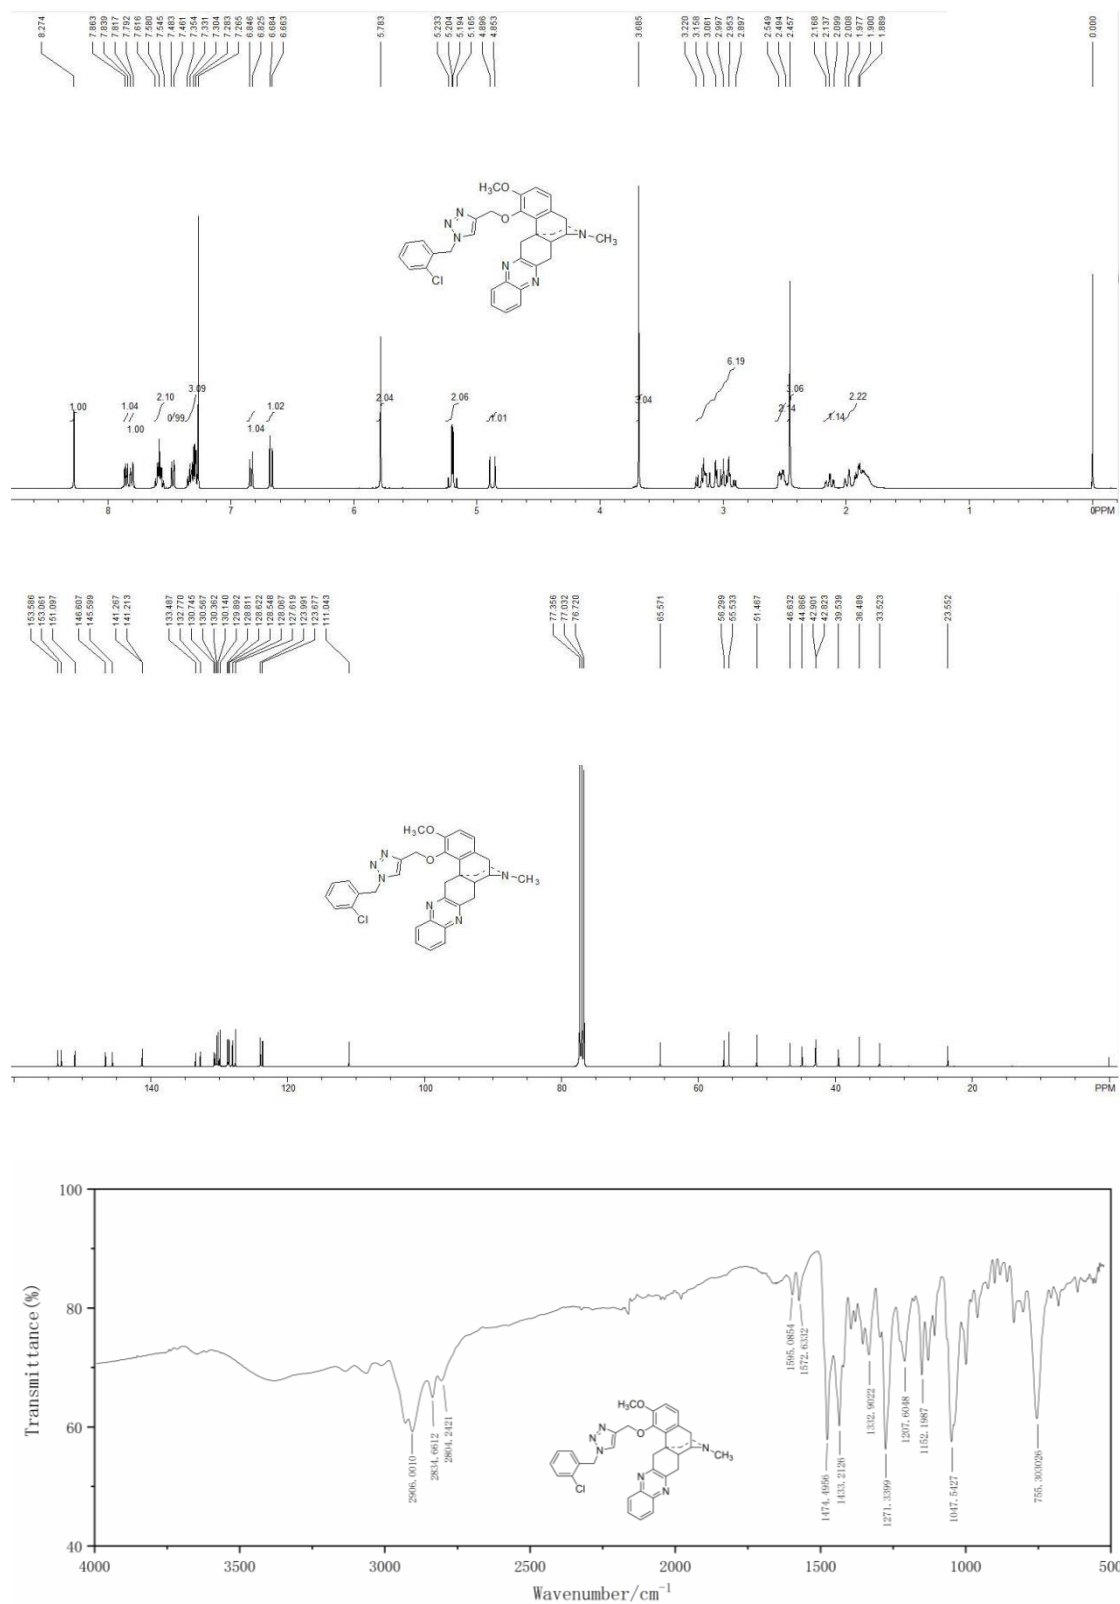

**Figure S4** NMR and FT-IR spectra of **6b**

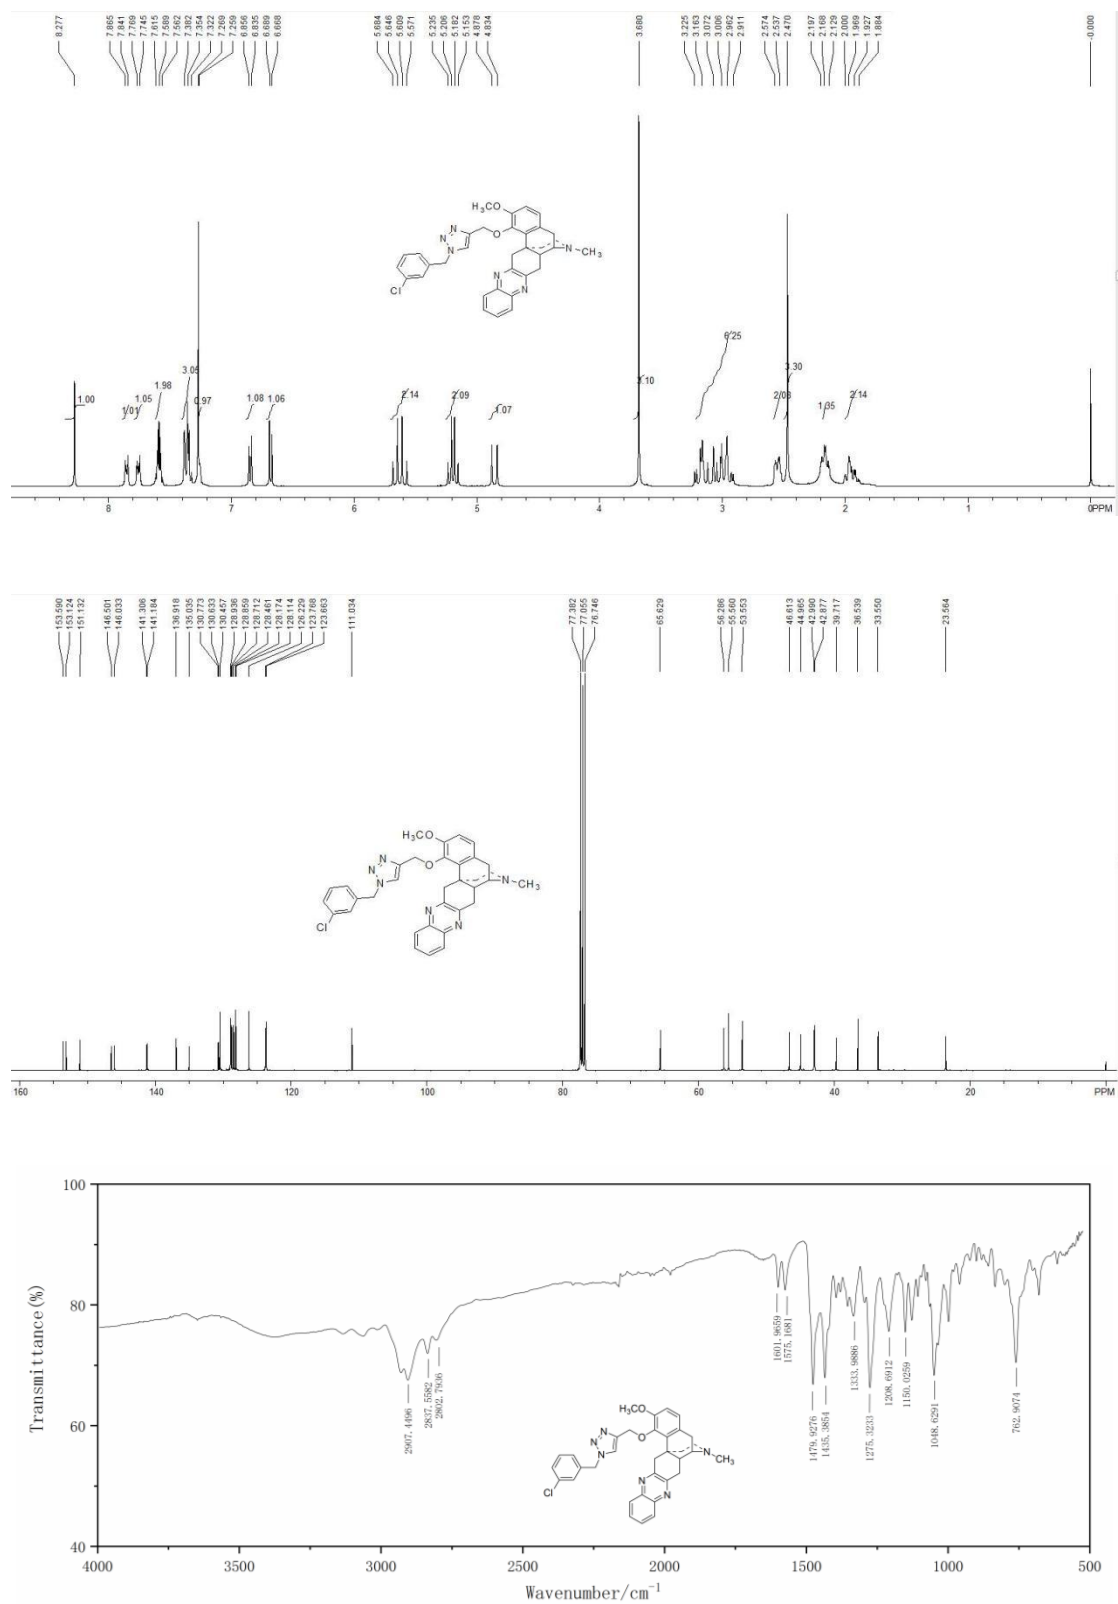

Figure S5 NMR and FT-IR spectra of 6c

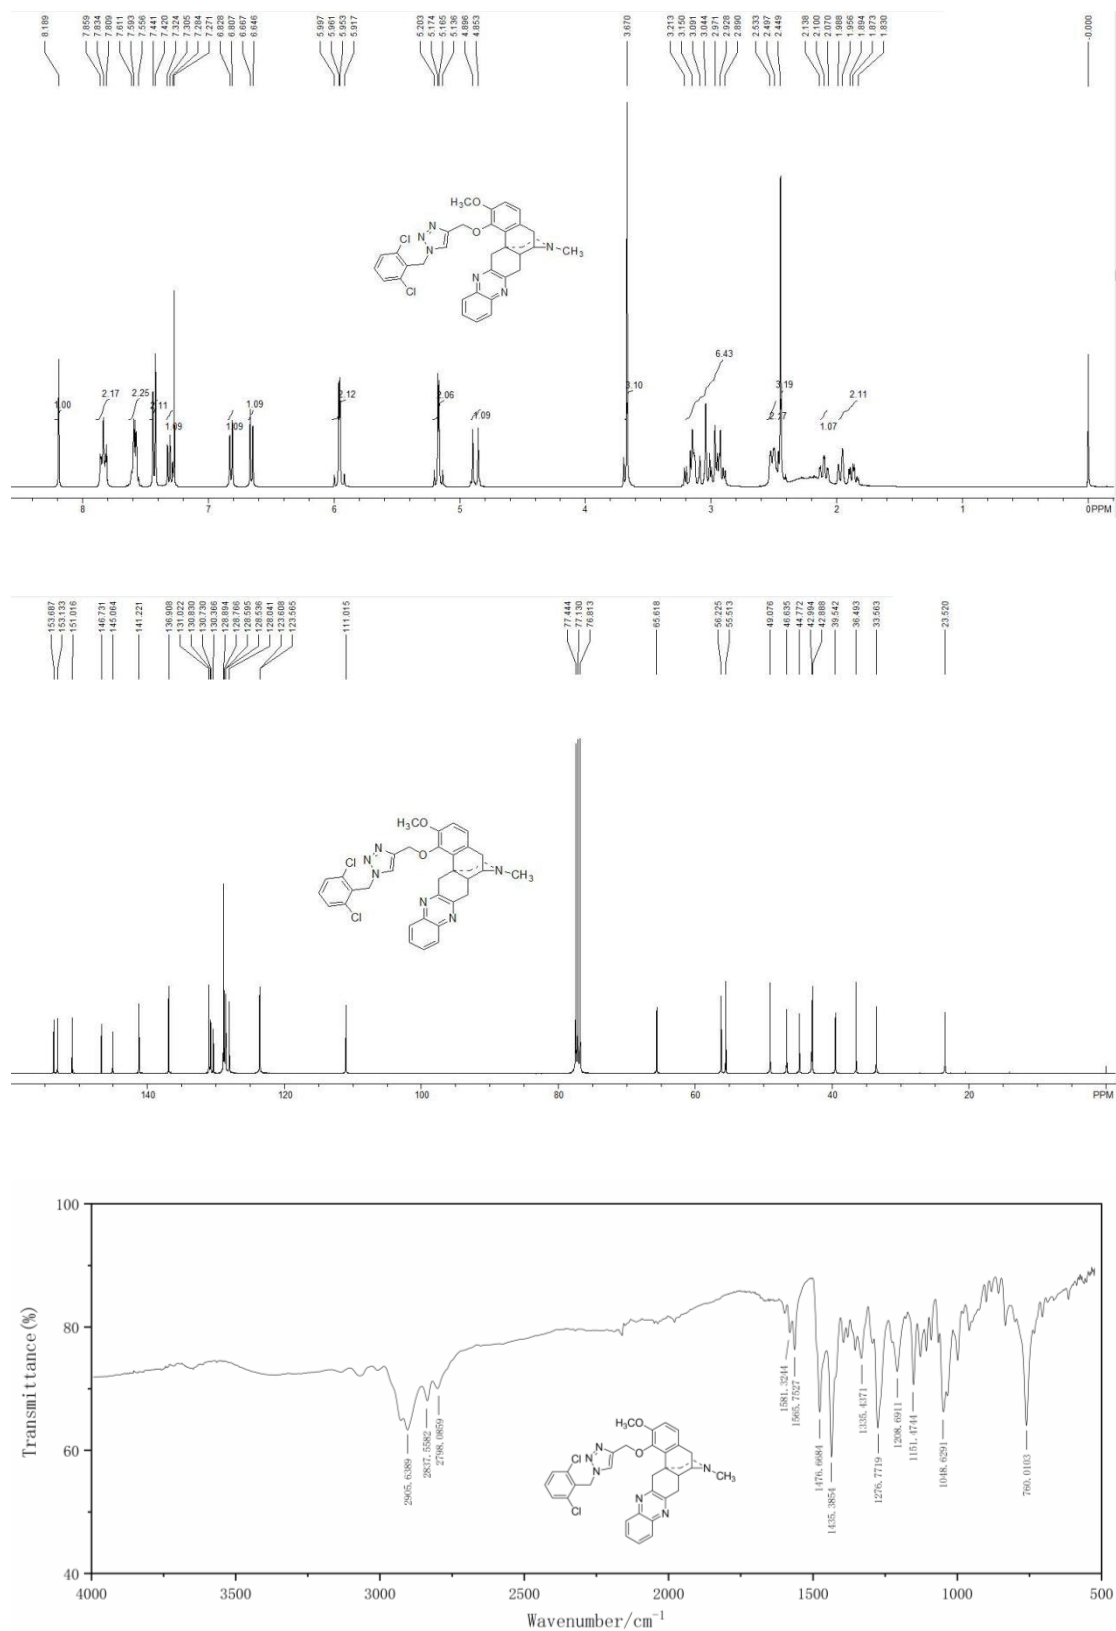

**Figure S6** NMR and FT-IR spectra of **6d**



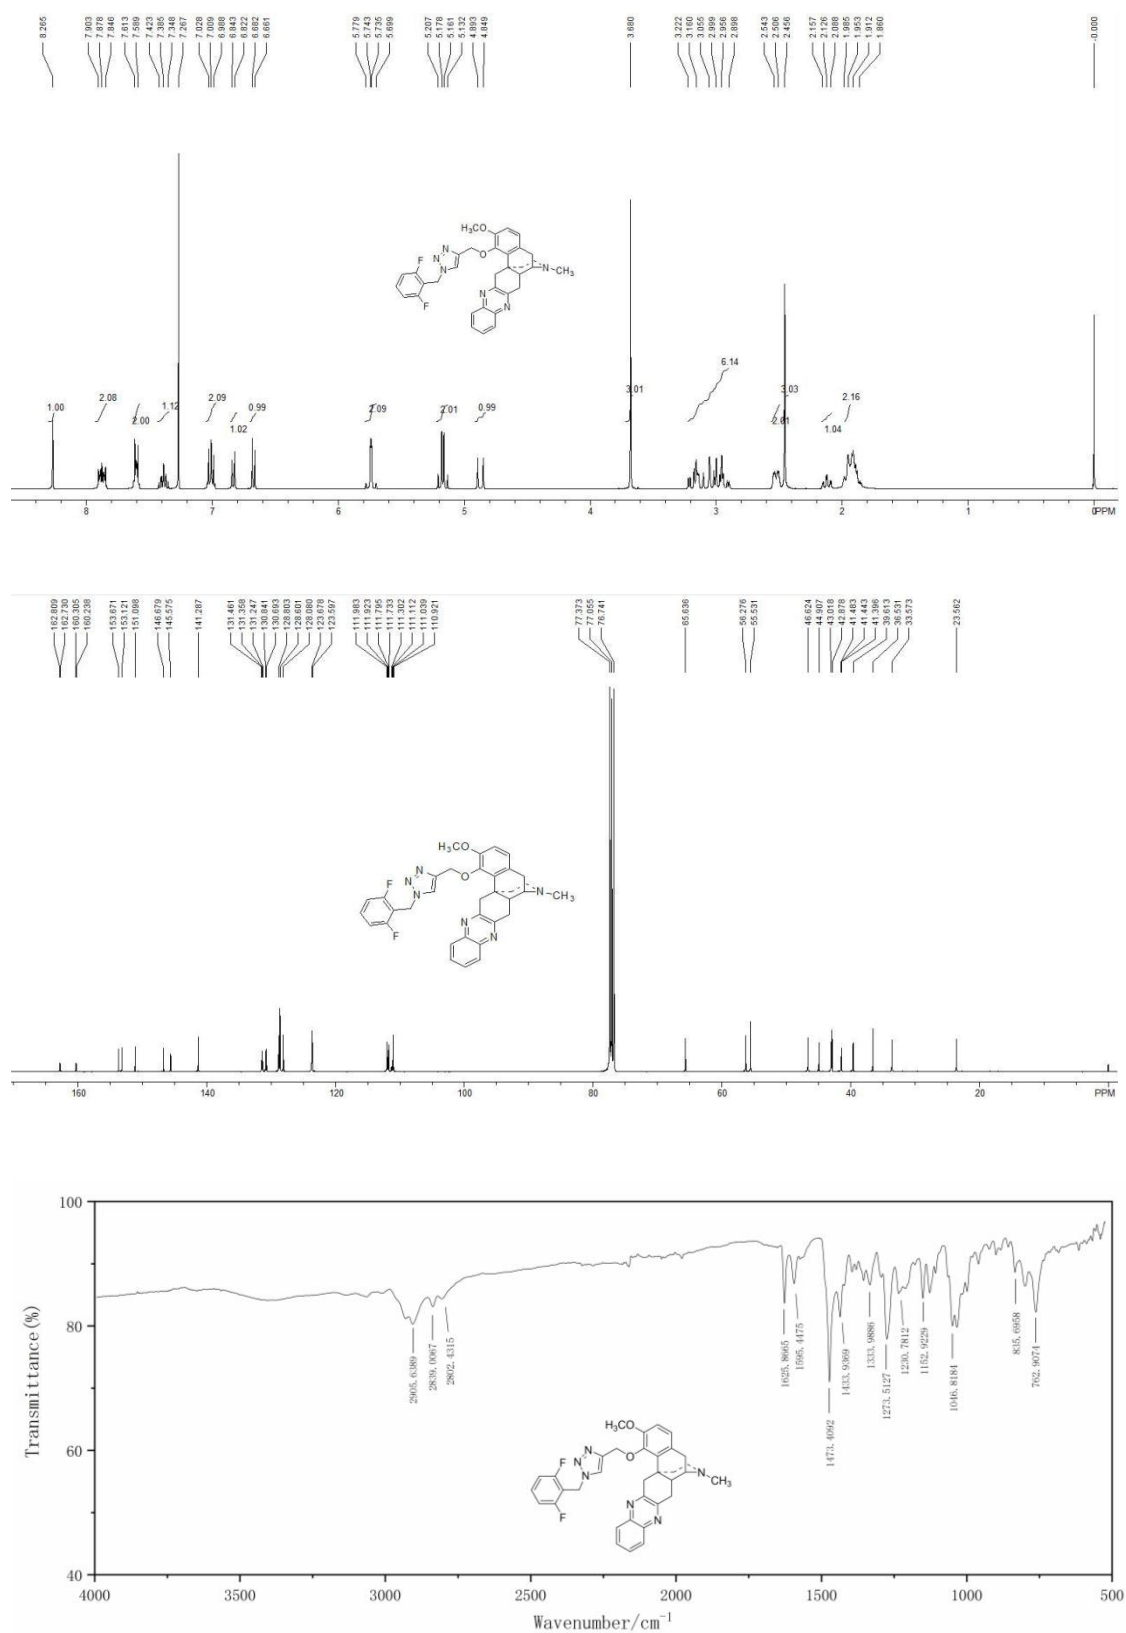

**Figure S8** NMR and FT-IR spectra of **6f**



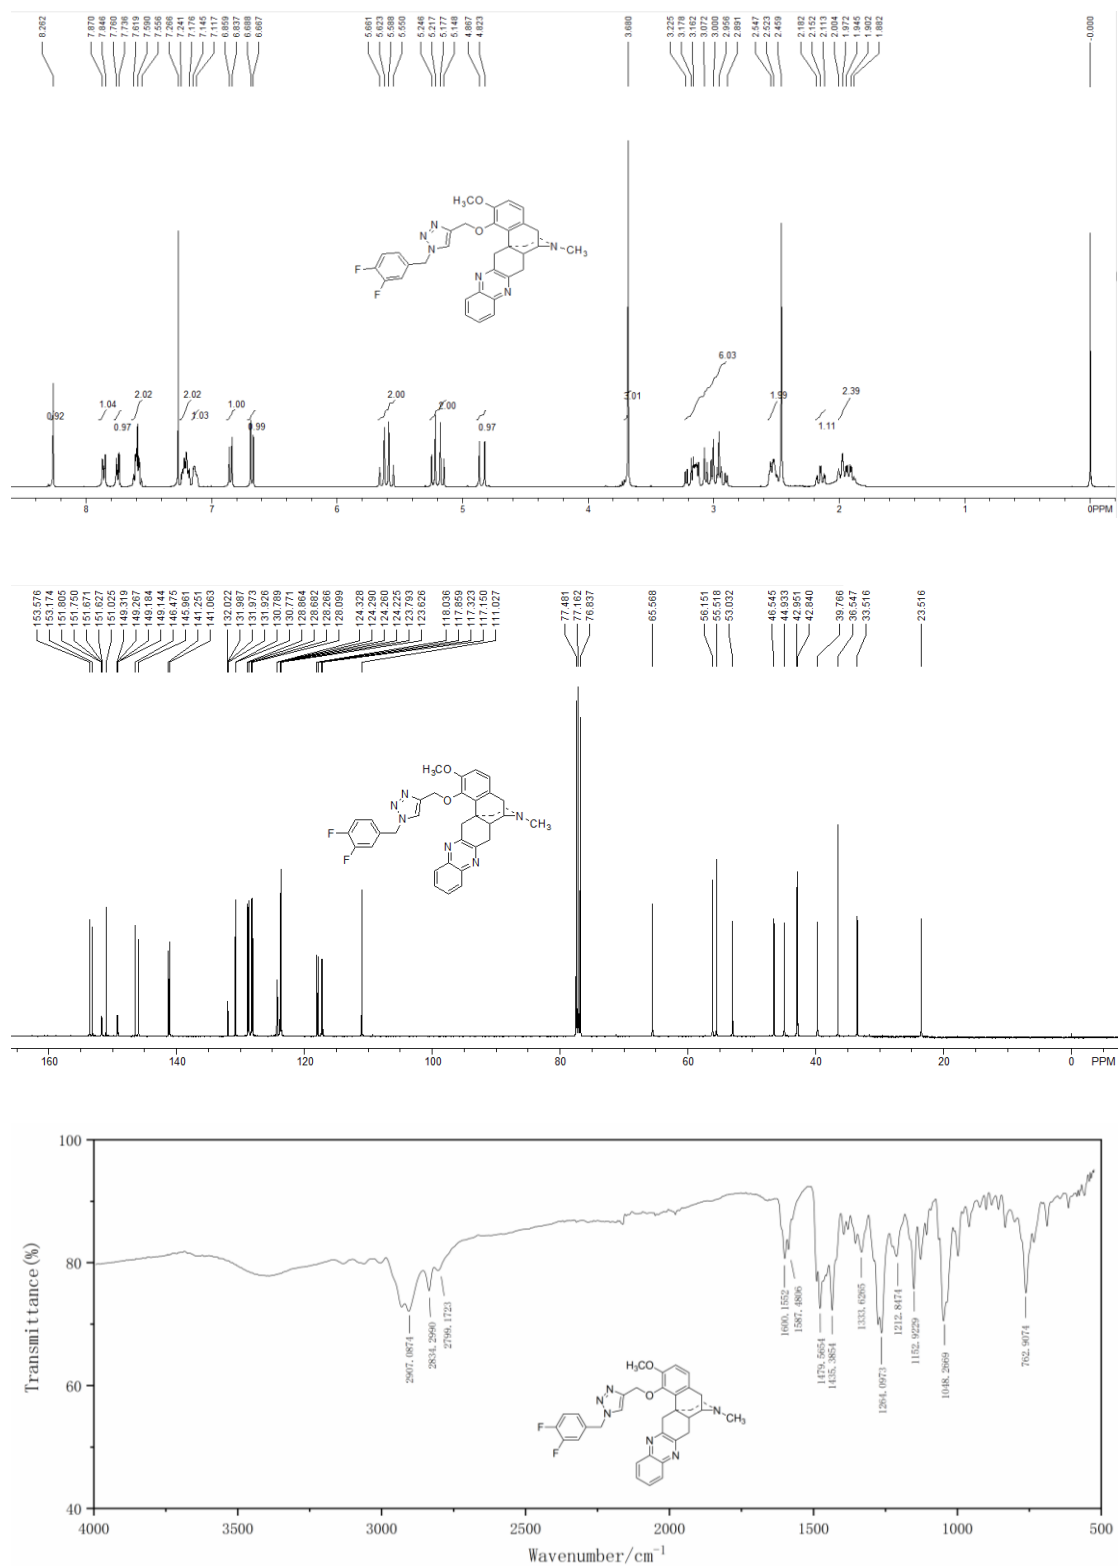

**Figure S10** NMR and FT-IR spectra of 6h



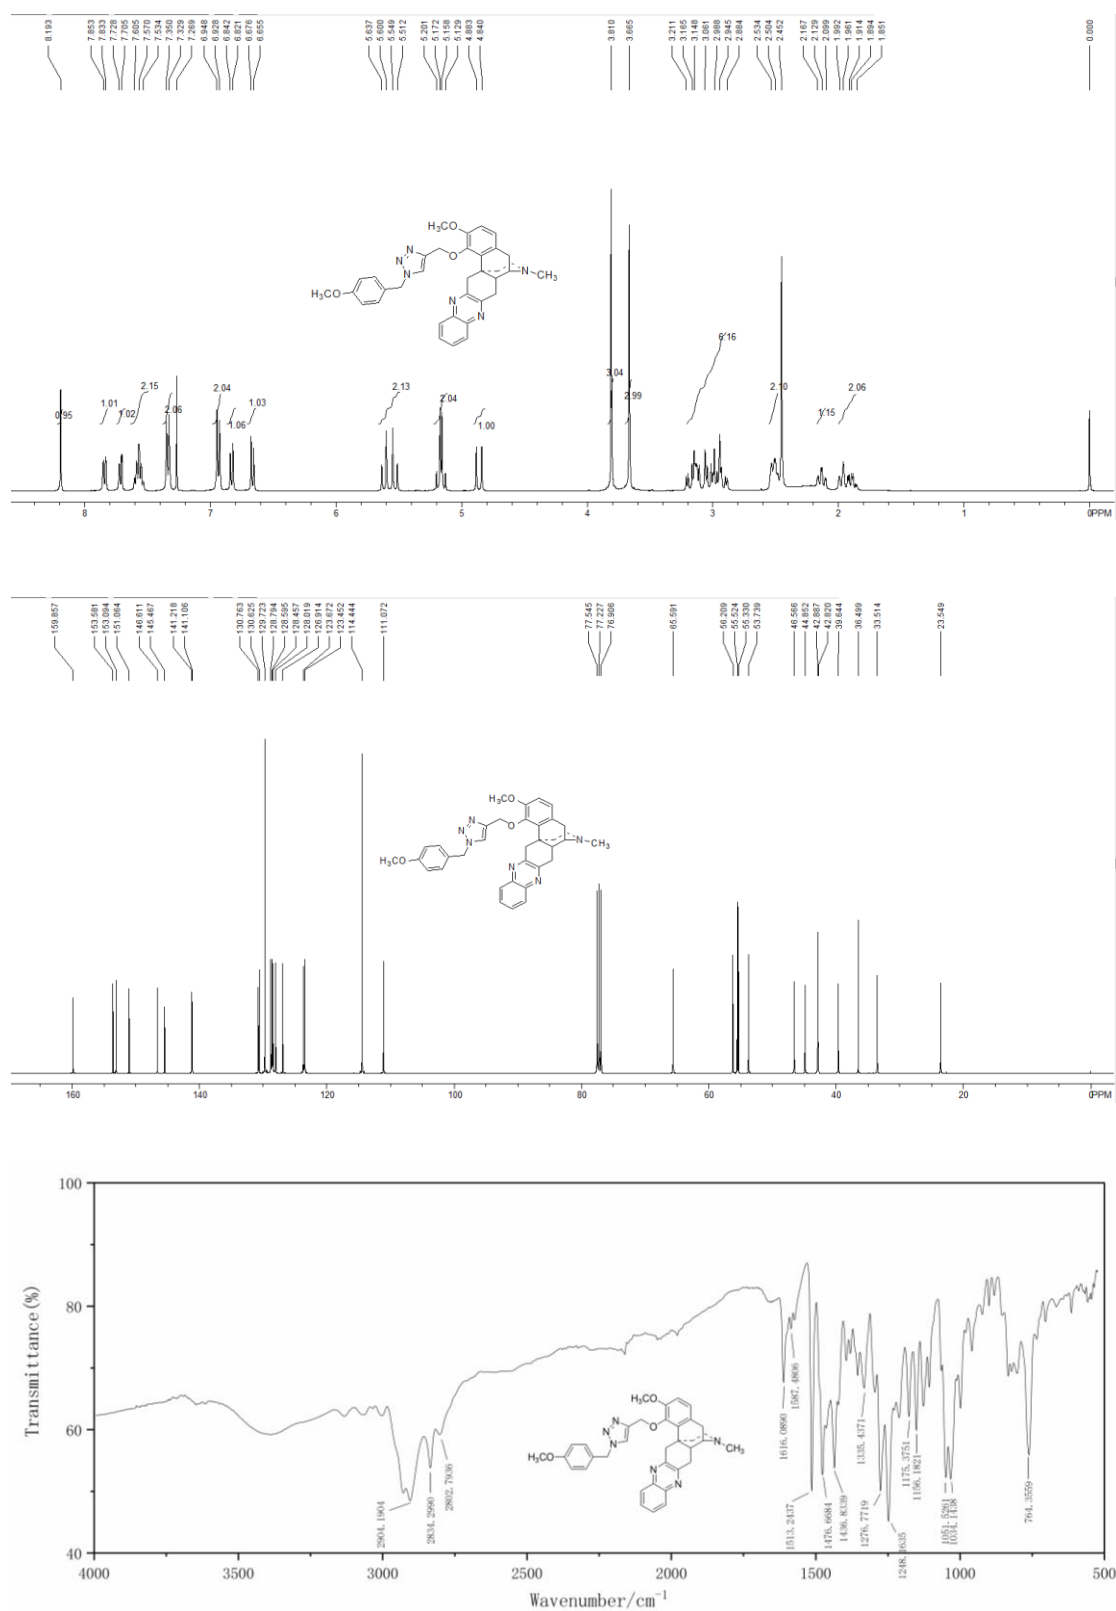

Figure S12 NMR and FT-IR spectra of 6j

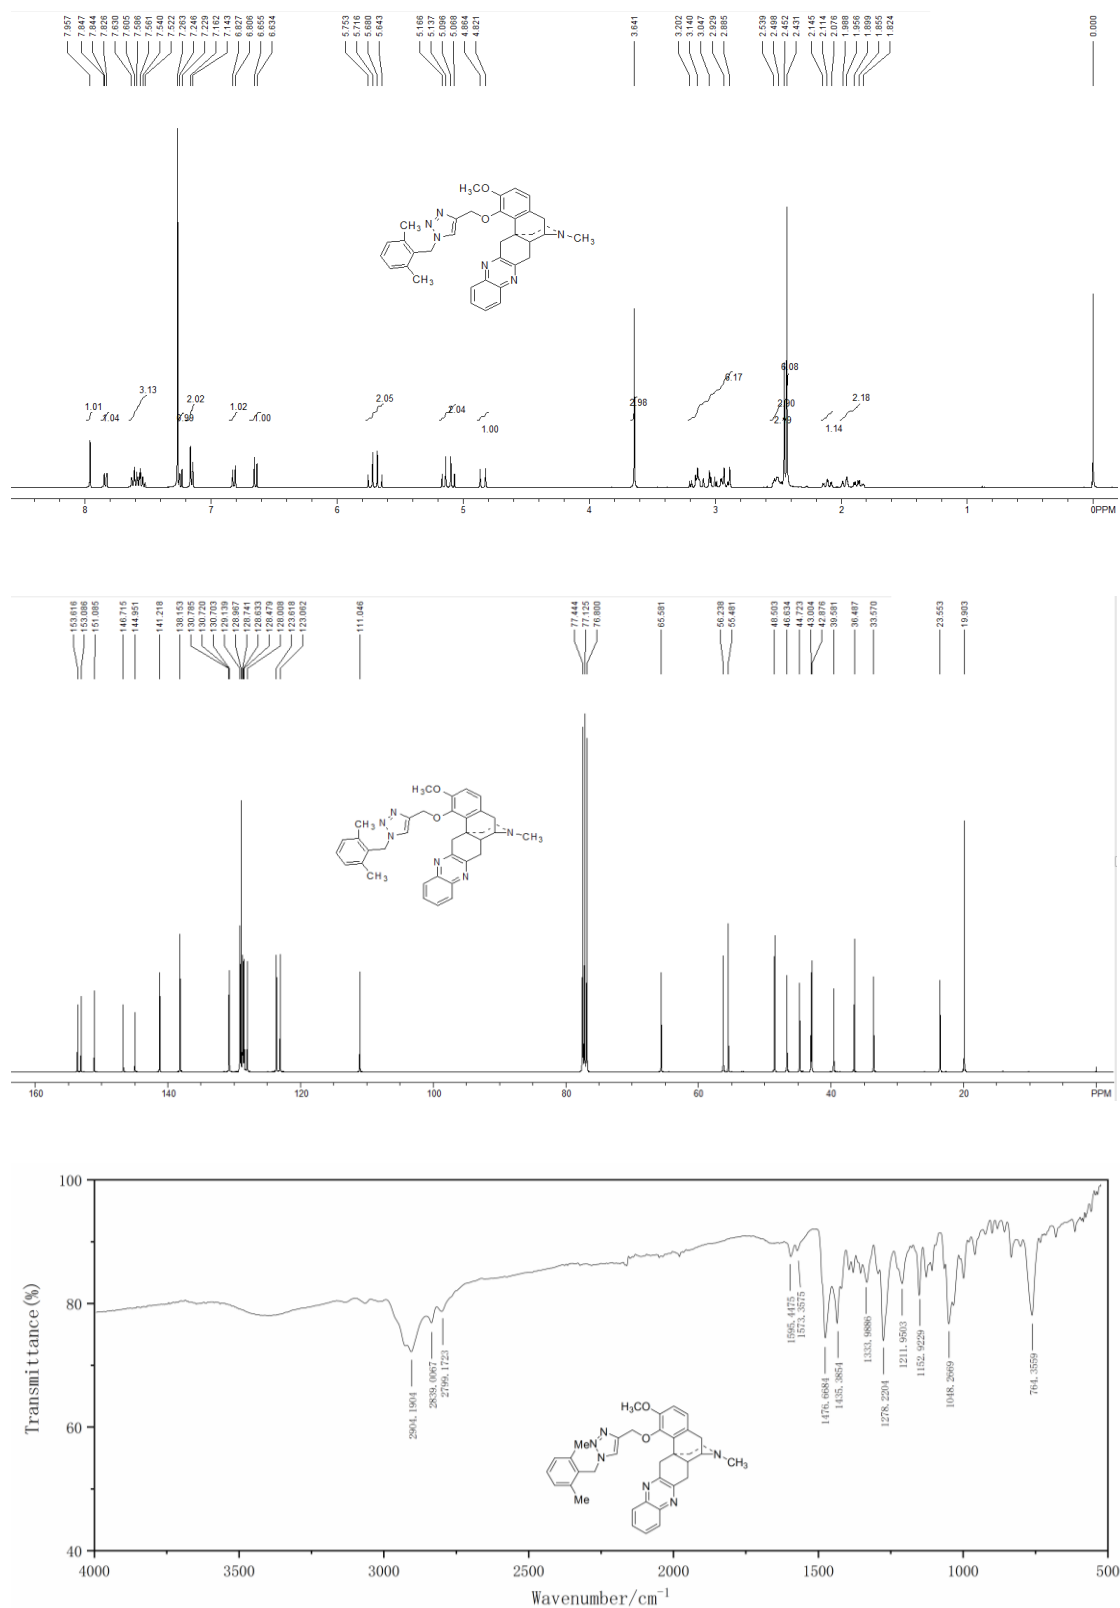

**Figure S13** NMR and FT-IR spectra of 6k

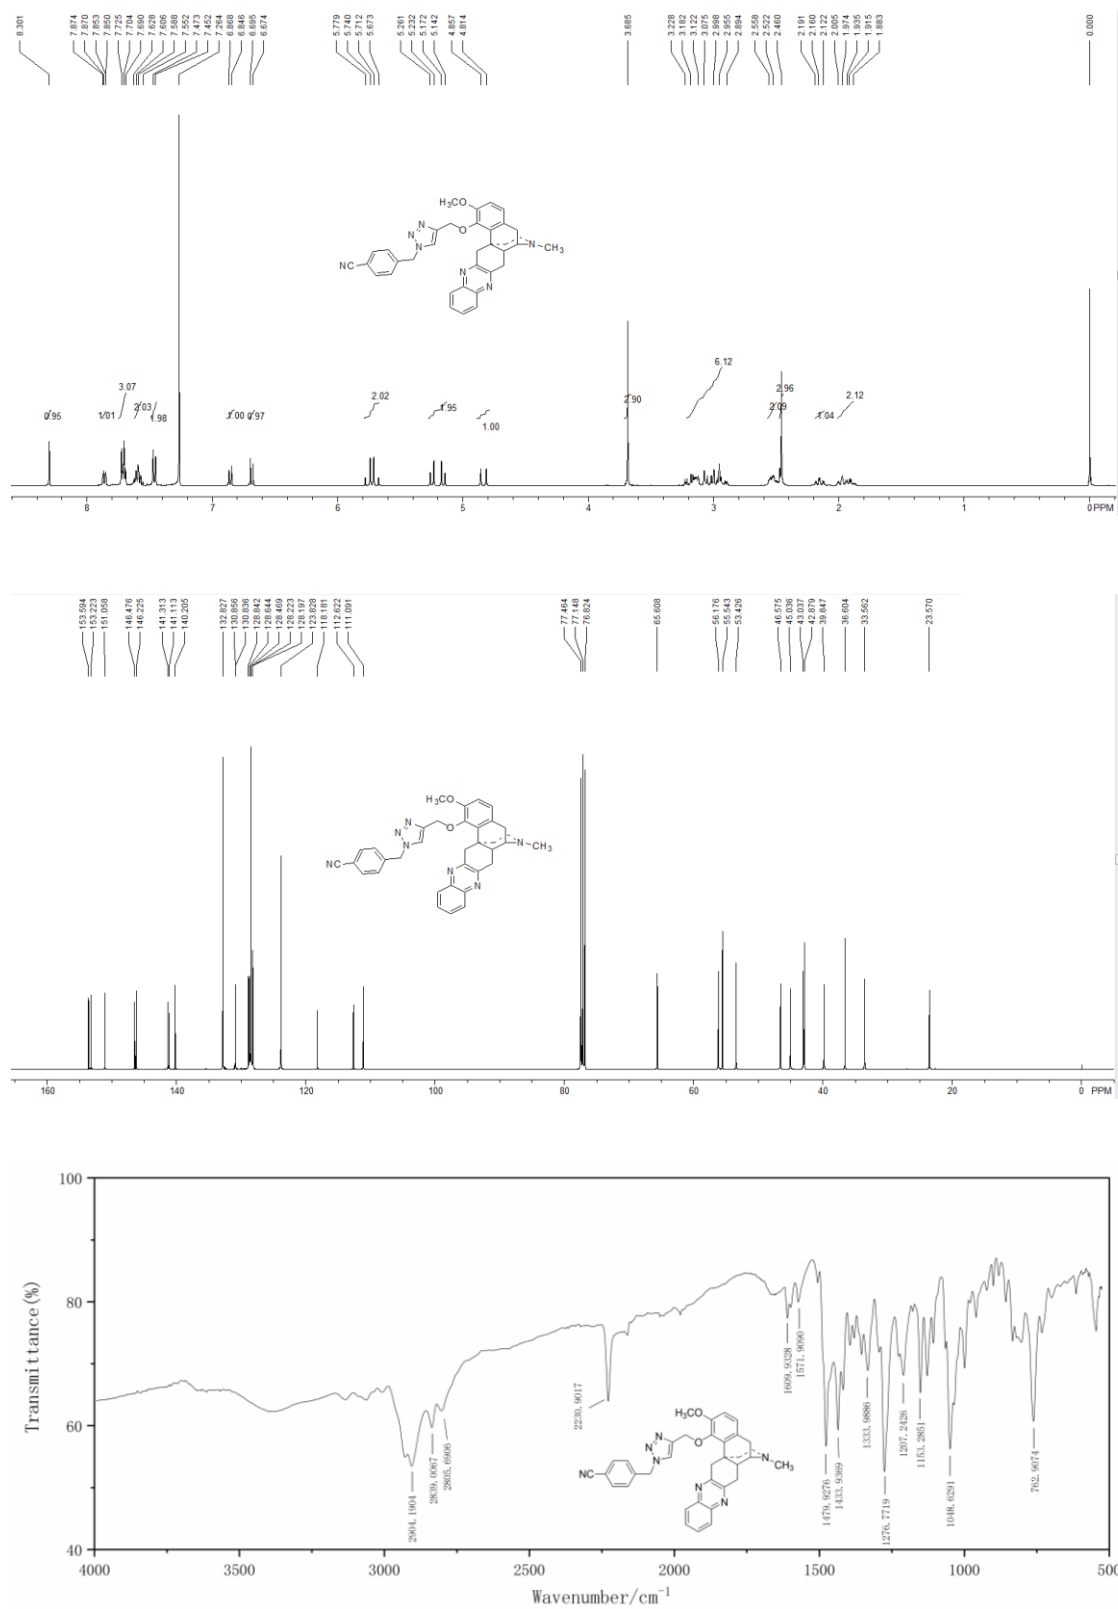

Figure S14 NMR and FT-IR spectra of 6l



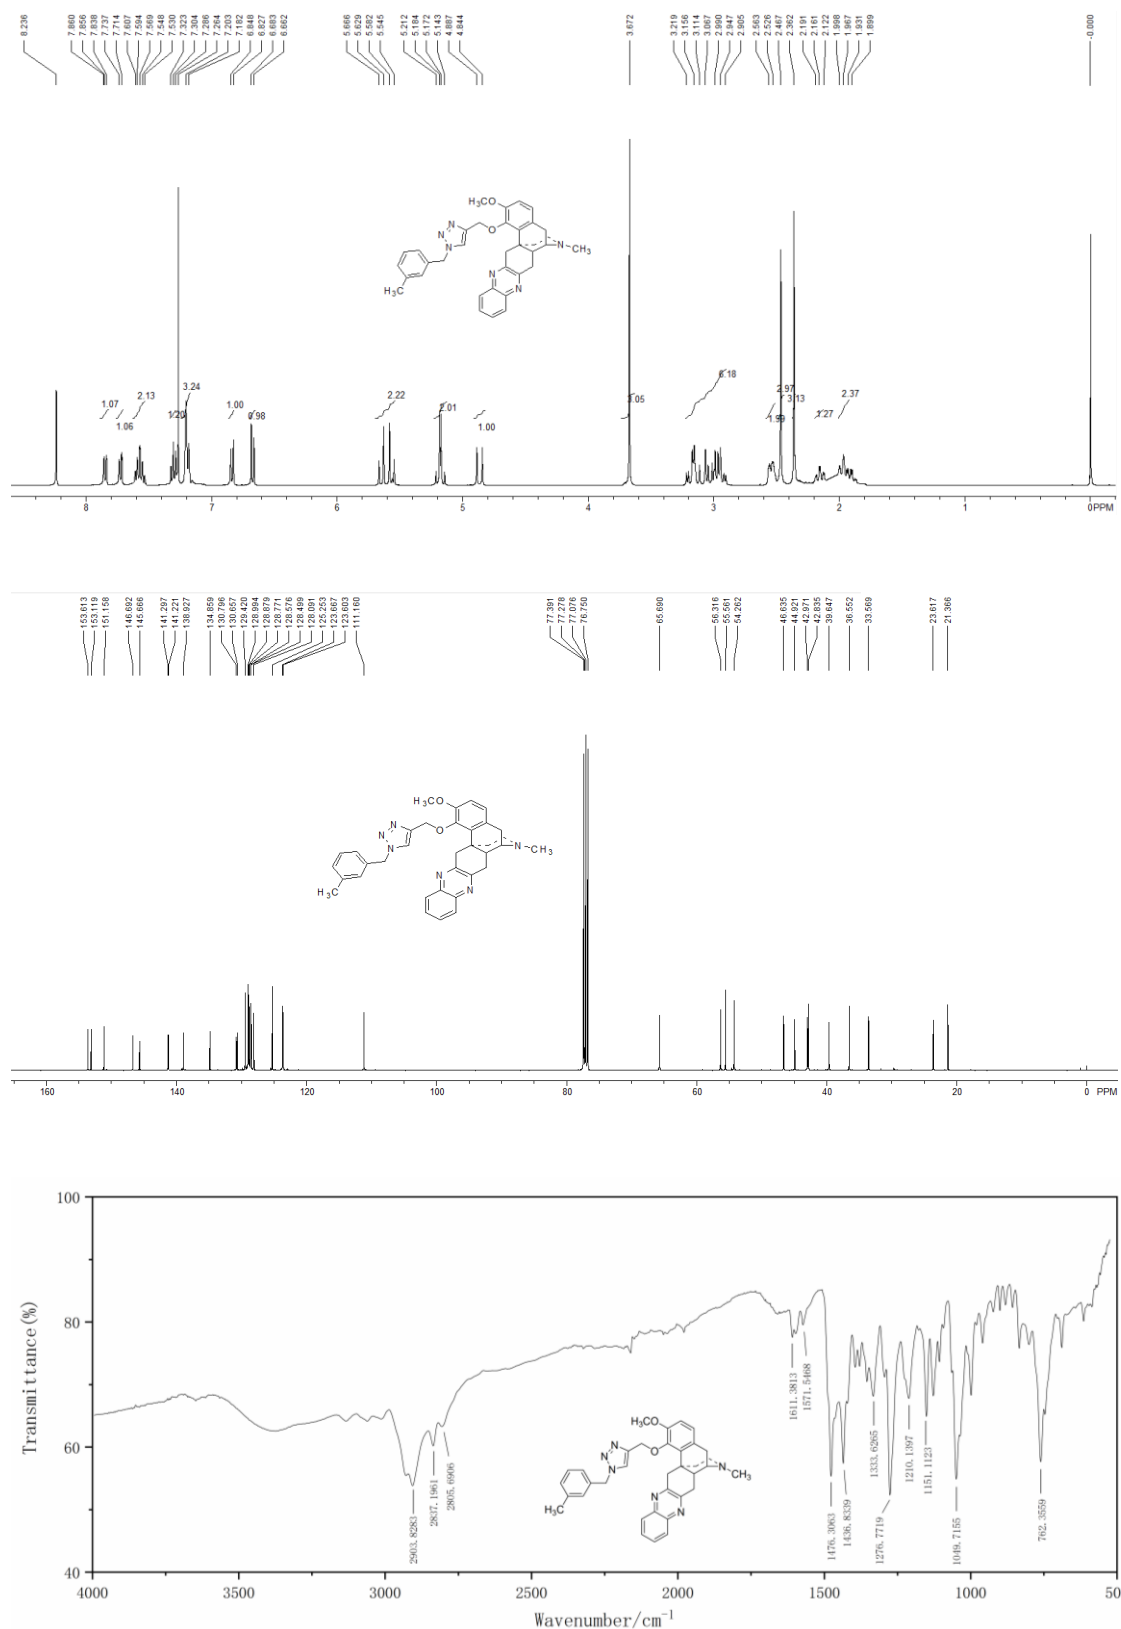

**Figure S16** NMR and FT-IR spectra of **6n**

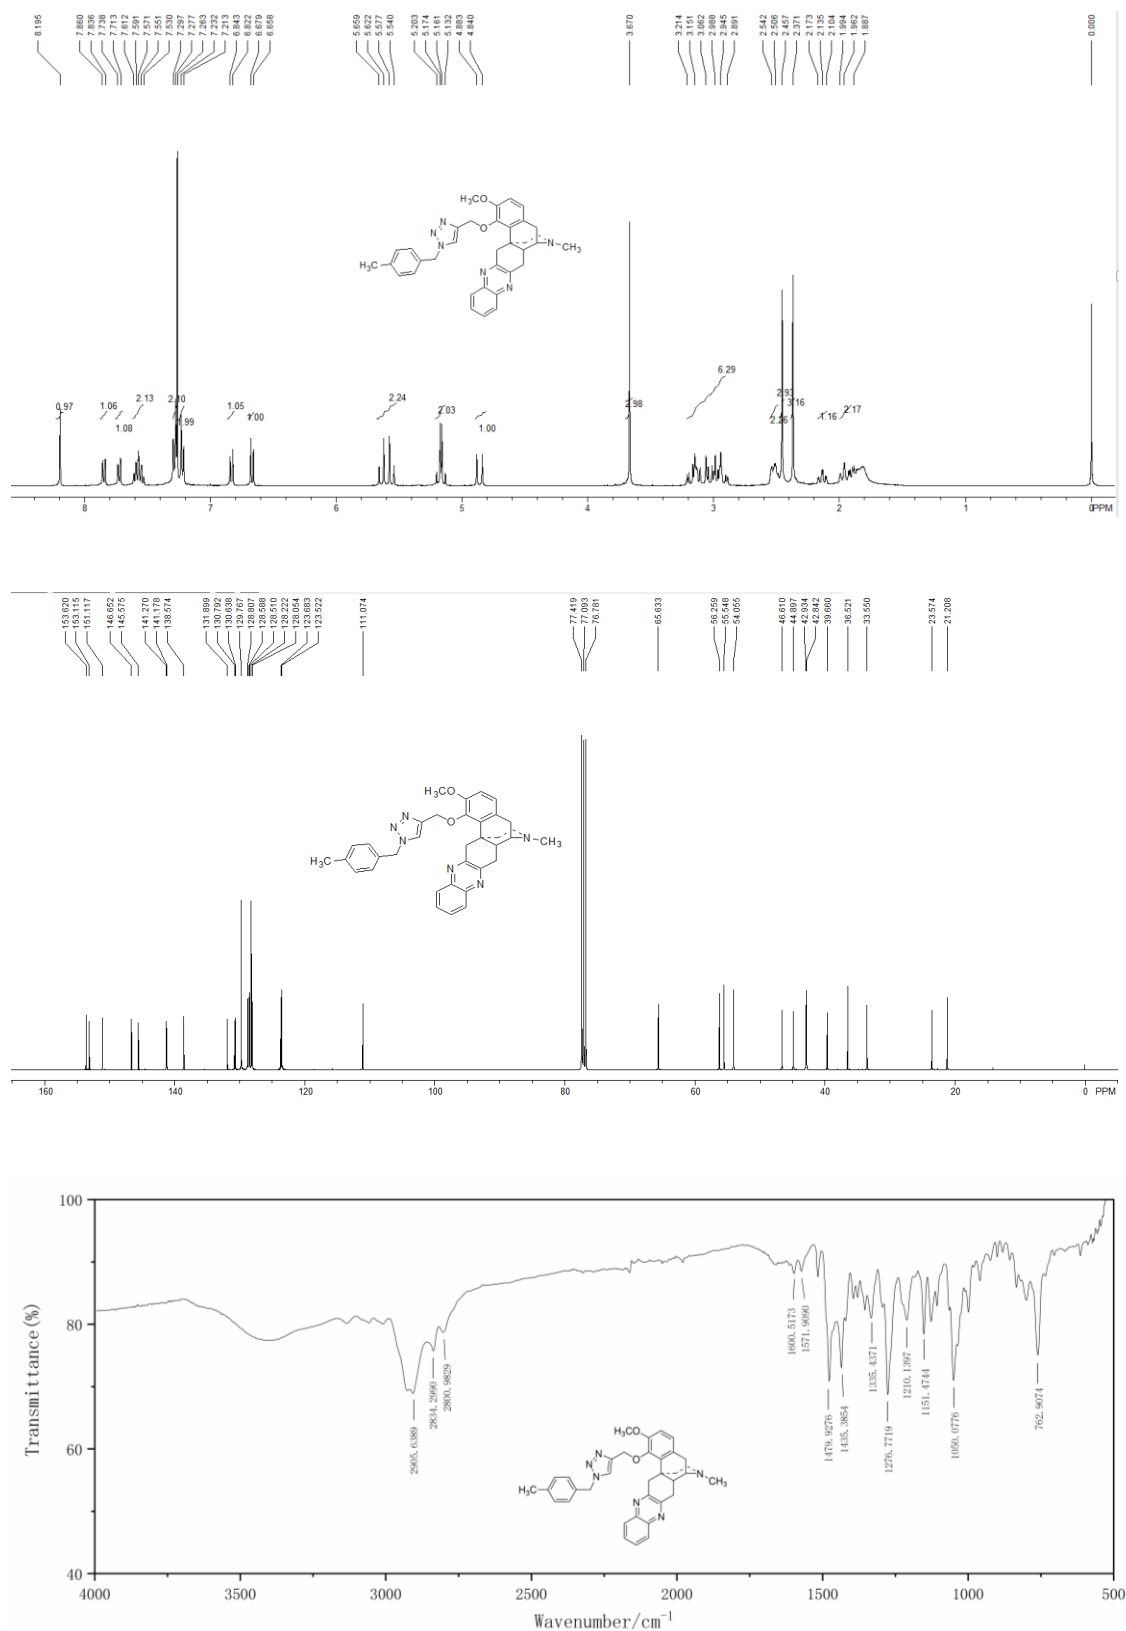

**Figure S17** NMR and FT-IR spectra of **60**

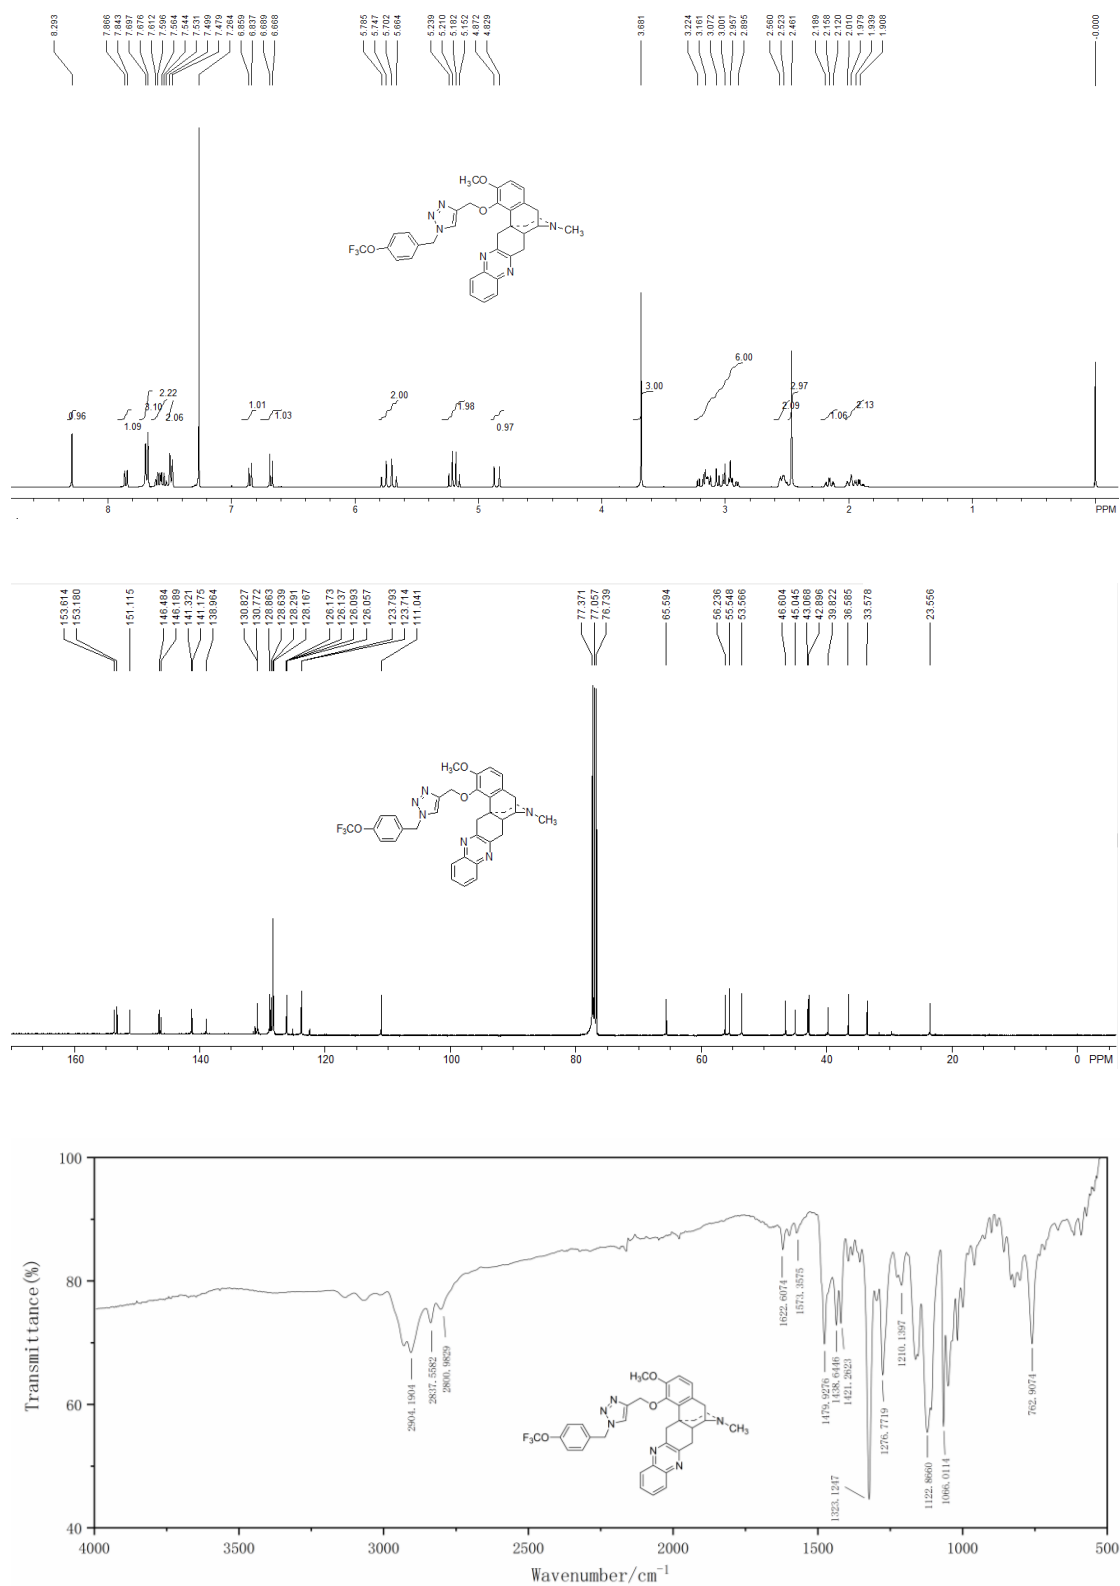

Figure S18 NMR and FT-IR spectra of 6p

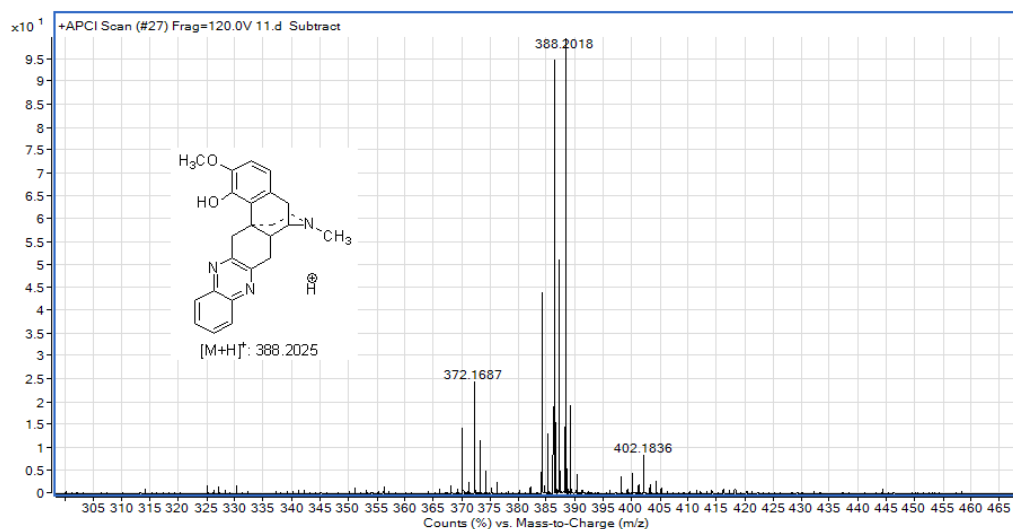

Figure S19 HRMS of 3

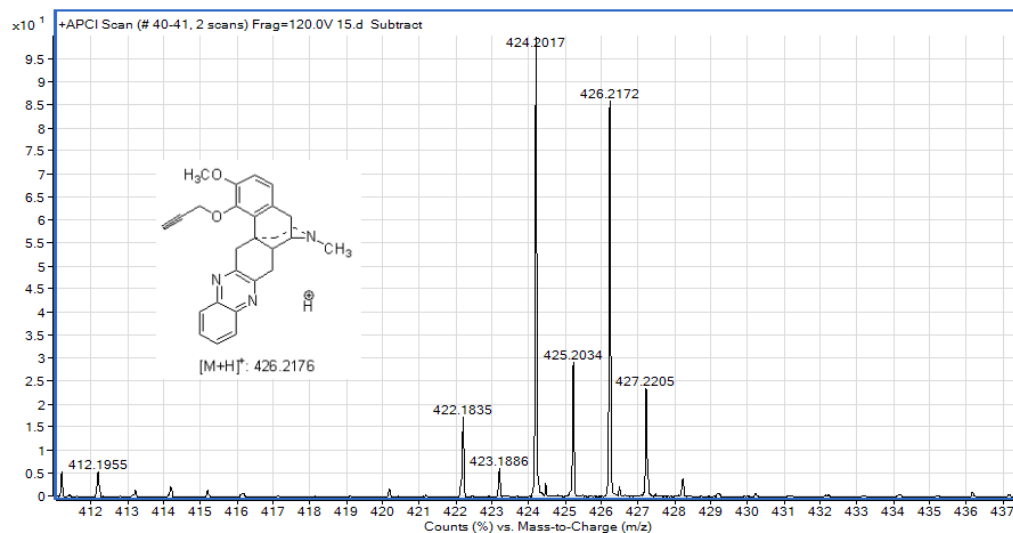

Figure S20 HRMS of 4

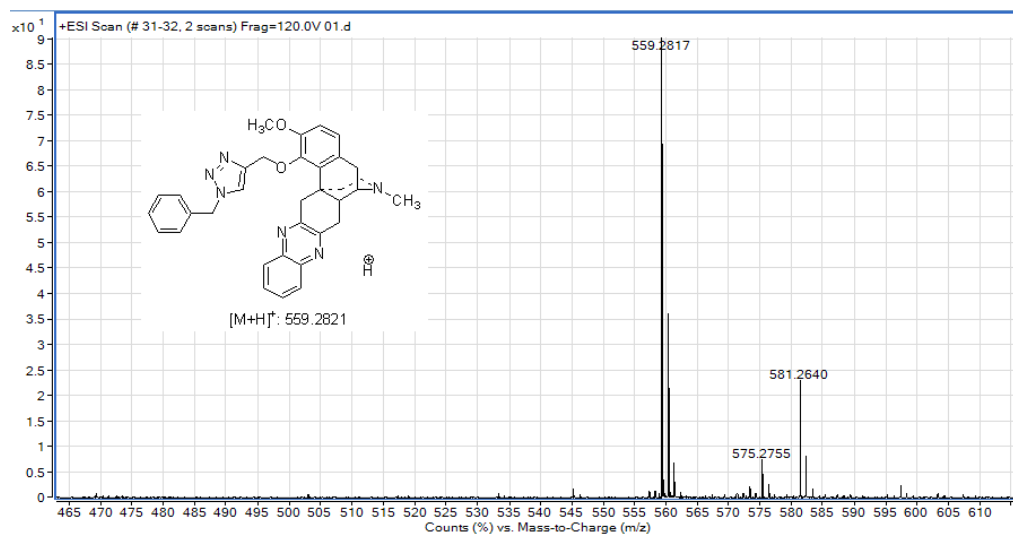

Figure S21 HRMS of 6a

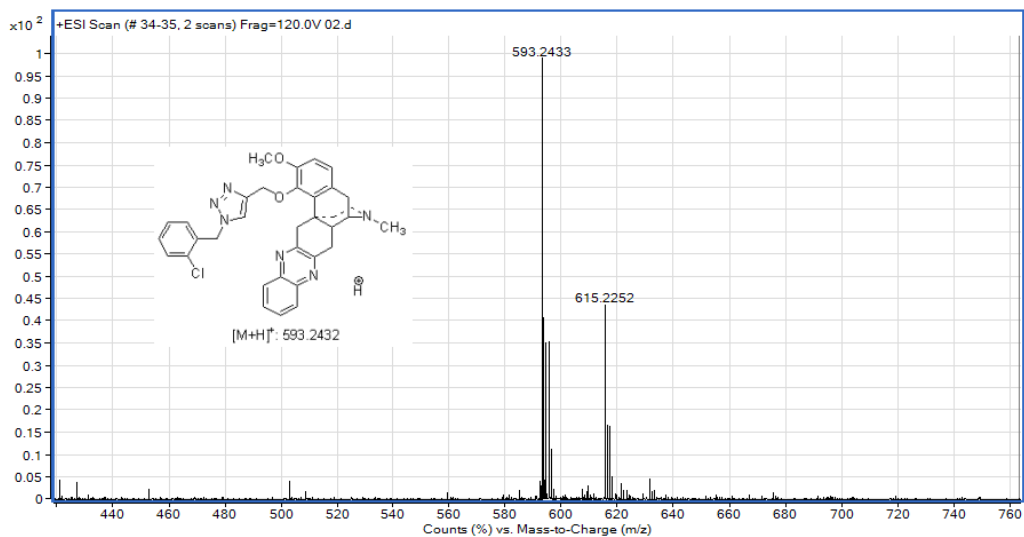

Figure S22 HRMS of 6b

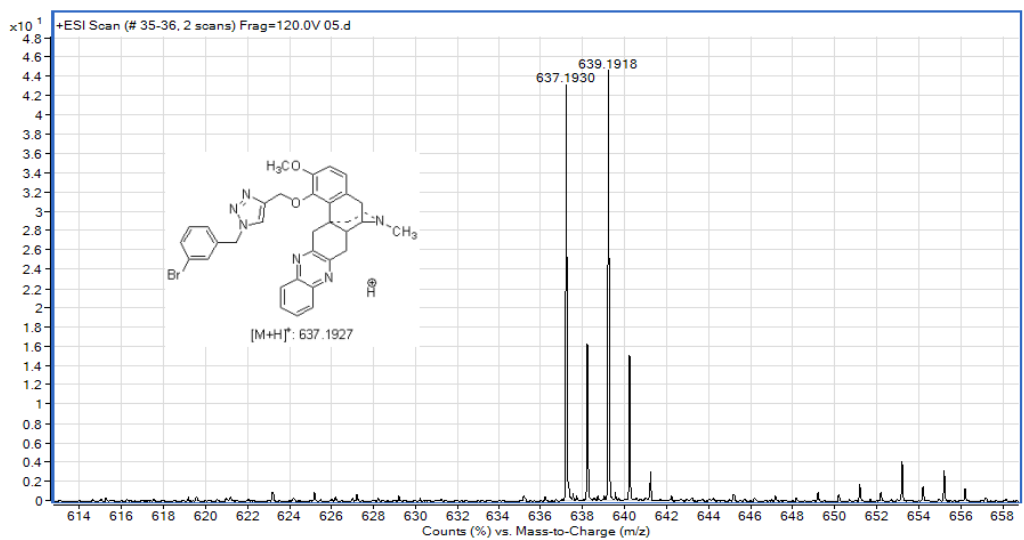

Figure S23 HRMS of 6c

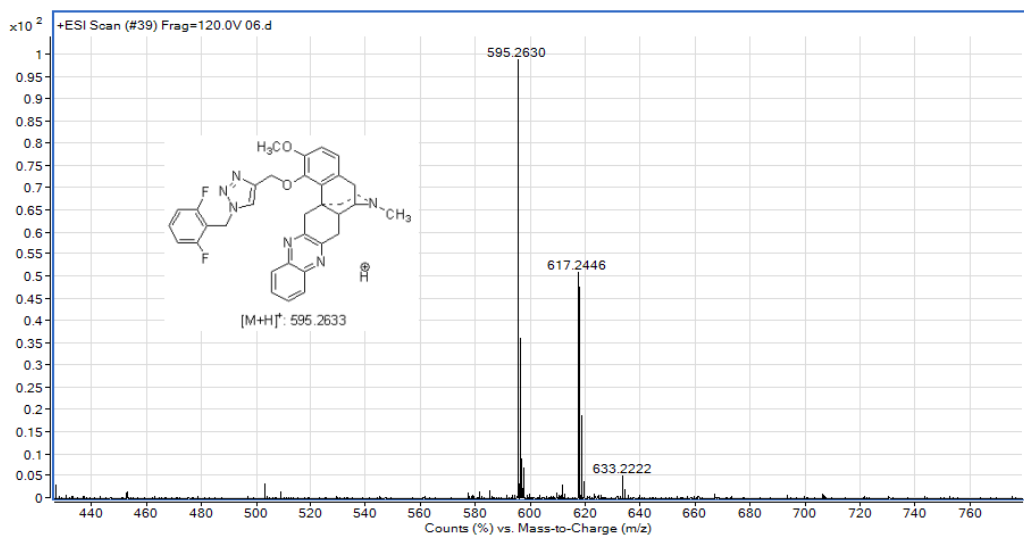

Figure S24 HRMS of 6f

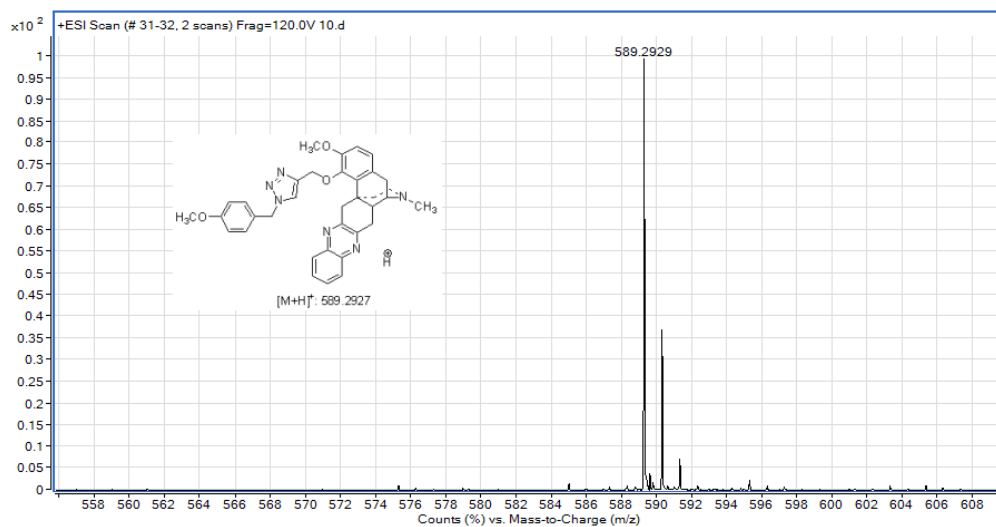

Figure S25 HRMS of 6j

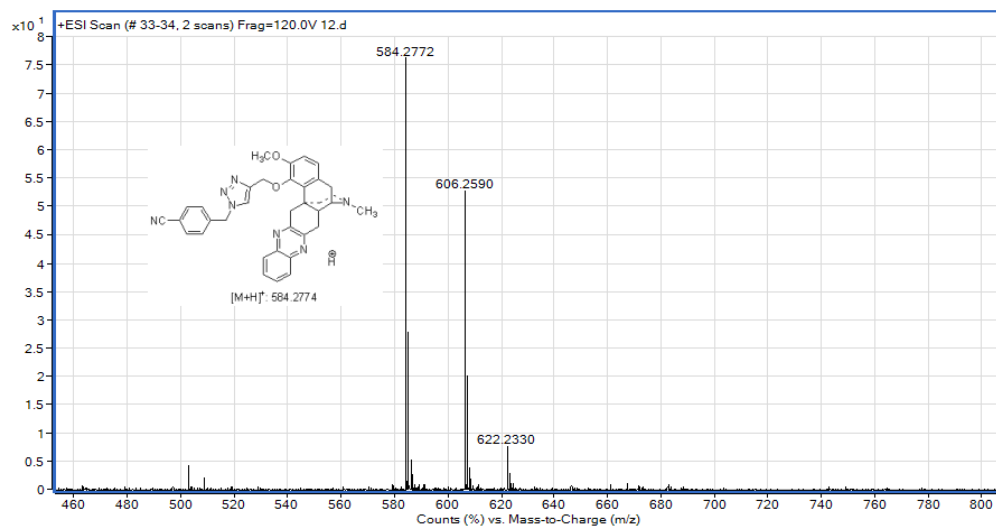

Figure S26 HRMS of 6l

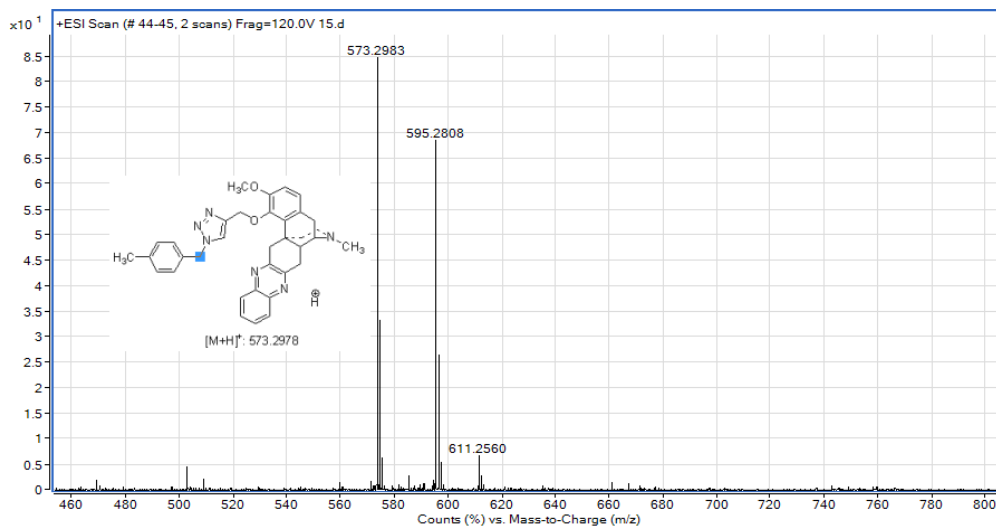

Figure S27 HRMS of 6o

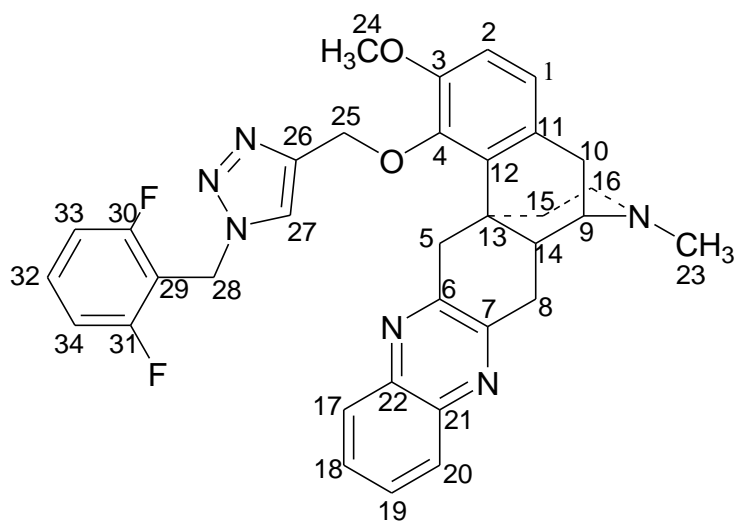

**6f**

| Data No. | ppm.                                 | C No.                         | Peak shape                                                                           |
|----------|--------------------------------------|-------------------------------|--------------------------------------------------------------------------------------|
| 1-4      | 162.8,<br>162.7,<br>160.3,<br>160.2, | C30<br>C31<br>(C-F couplings) | 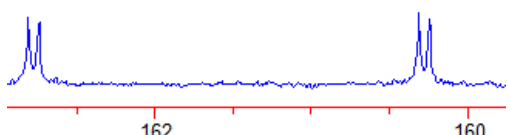  |
| 5-6      | 153.7,<br>153.1                      | C6<br>C7                      |  |
| 7        | 151.1                                | C3                            |  |

|       |                            |                         |                                                                                      |
|-------|----------------------------|-------------------------|--------------------------------------------------------------------------------------|
| 8     | 146.7                      | C4                      | 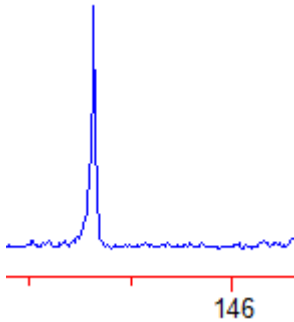   |
| 9     | 145.6                      | C26                     |    |
| 10    | 141.3                      | C21<br>C22<br>(overlap) |   |
| 11-13 | 131.5,<br>131.4,<br>131.2, | C32<br>(C-F couplings)  |  |

|       |                            |                                       |                                                                                      |
|-------|----------------------------|---------------------------------------|--------------------------------------------------------------------------------------|
| 14-15 | 130.8,<br>130.7,           | C11<br>C12                            | 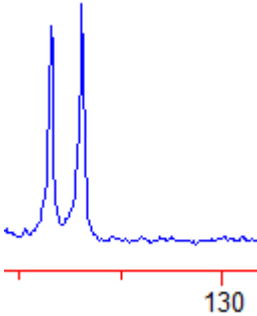   |
| 16-18 | 128.8,<br>128.6,<br>128.1, | C17<br>C18<br>C19<br>C20<br>(overlap) |   |
| 19-20 | 123.7,<br>123.6,           | C1<br>C27                             |  |

|          |                                      |                               |                                                                                      |
|----------|--------------------------------------|-------------------------------|--------------------------------------------------------------------------------------|
| 21-24    | 112.0,<br>111.9,<br>111.8,<br>111.7, | C33<br>C34<br>(C-F couplings) | 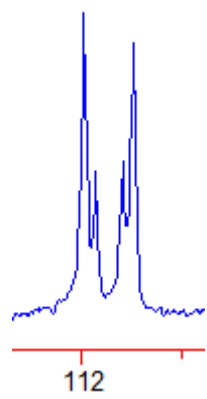   |
| 25-26,28 | 111.3,<br>111.1,<br>110.9,           | C29<br>(C-F couplings)        |   |
| 27       | 111.0,                               | C2                            |  |

|       |                |           |                                                                                                                                                                                                                                                              |
|-------|----------------|-----------|--------------------------------------------------------------------------------------------------------------------------------------------------------------------------------------------------------------------------------------------------------------|
| 29    | 65.6,          | C25       | 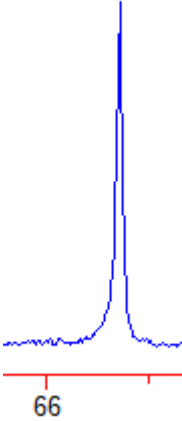 <p>A chromatogram plot with a single sharp peak. The x-axis is labeled with '66' at the base of the peak. The peak is blue and rises from a noisy baseline.</p>           |
| 30-31 | 56.3,<br>55.5, | C9<br>C3  |  <p>A chromatogram plot showing two distinct sharp peaks. The x-axis is labeled with '56' between the two peaks. Both peaks are blue and rise from a noisy baseline.</p>  |
| 32-33 | 46.6,<br>44.9, | C5<br>C16 |  <p>A chromatogram plot showing two distinct sharp peaks. The x-axis is labeled with '46' between the two peaks. Both peaks are blue and rise from a noisy baseline.</p> |

|       |                         |                        |                                                                                      |
|-------|-------------------------|------------------------|--------------------------------------------------------------------------------------|
| 34-35 | 43.0,<br>42.9,          | C14<br>C23             | 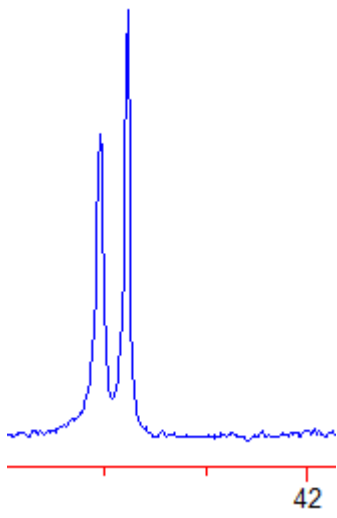   |
| 36-38 | 41.5,<br>41.4,<br>41.3, | C28<br>(C-F couplings) |   |
| 39    | 39.6,                   | C8                     |  |

|    |       |     |                                                                                      |
|----|-------|-----|--------------------------------------------------------------------------------------|
| 40 | 36.5, | C13 | 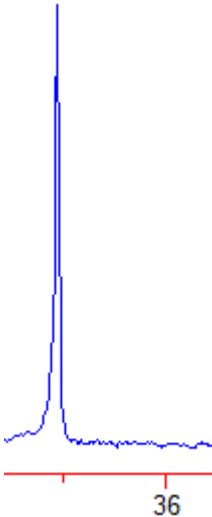   |
| 41 | 33.6, | C15 |   |
| 42 | 23.6  | C10 |  |
